# Supplementary material for: Population structure of mitochondrial genomes in Saccharomyces cerevisiae
Source: PubMed Central journal article supplement (PMC4464245; doi:10.1186/s12864-015-1664-4), 2015-06-11

**K=15**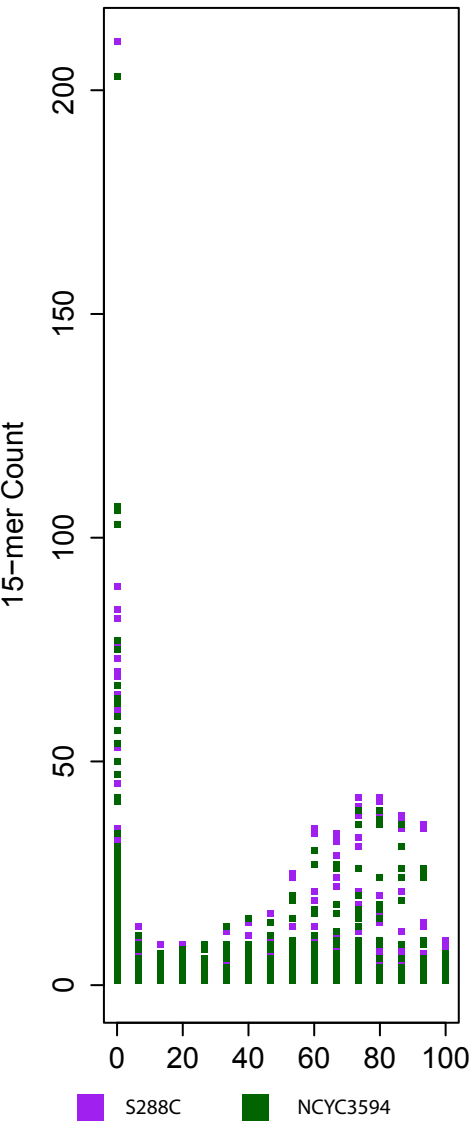**K=30**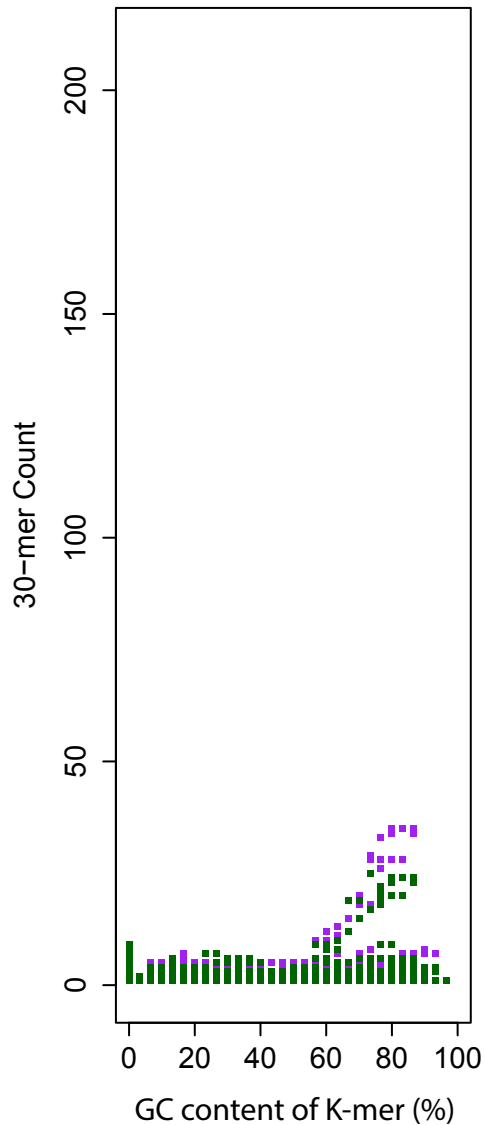**K=50**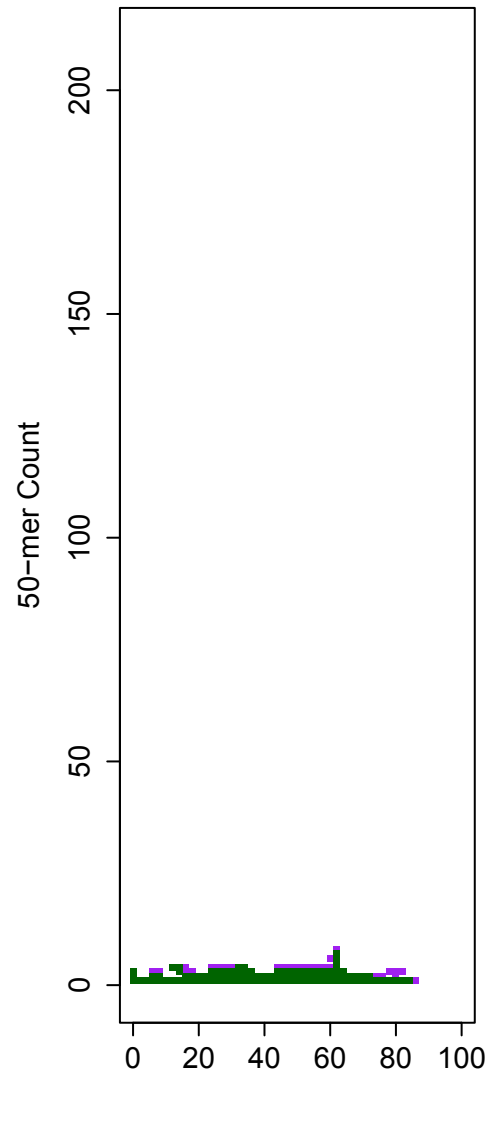

Supplement: 12864_2015_1664_MOESM6_ESM.pdf [file 12864_2015_1664_MOESM6_ESM.pdf]
