# Supplementary material for: Population structure of mitochondrial genomes in Saccharomyces cerevisiae
Source: PubMed Central journal article supplement (PMC4464245; doi:10.1186/s12864-015-1664-4), 2015-06-11

- mosaic-A
- mosaic-B
- wine/European
- North American
- sake
- Maylasian
- West African
- Unknown

— 0.1

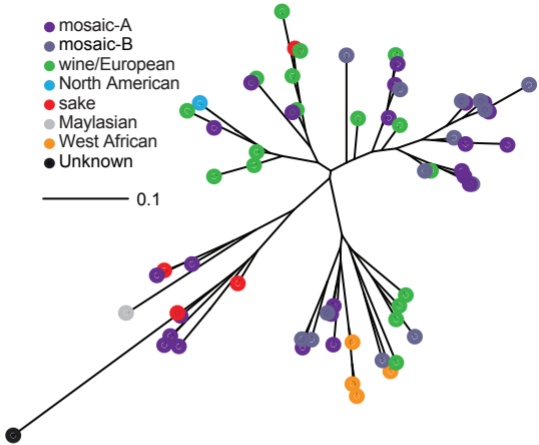

Supplement: 12864_2015_1664_MOESM7_ESM.pdf [file 12864_2015_1664_MOESM7_ESM.pdf]
